# Supplementary material for: The present and future burden of previously treated advanced non-small cell lung cancer (NSCLC) by histology and line of therapy in France, Germany, Italy, and Spain: model-based predictions
Source: Springer Nature journal article supplement (doi:10.1186/s12963-018-0174-4), 2018-11-26

## Additional file 1. Comprehensive Literature Search Results

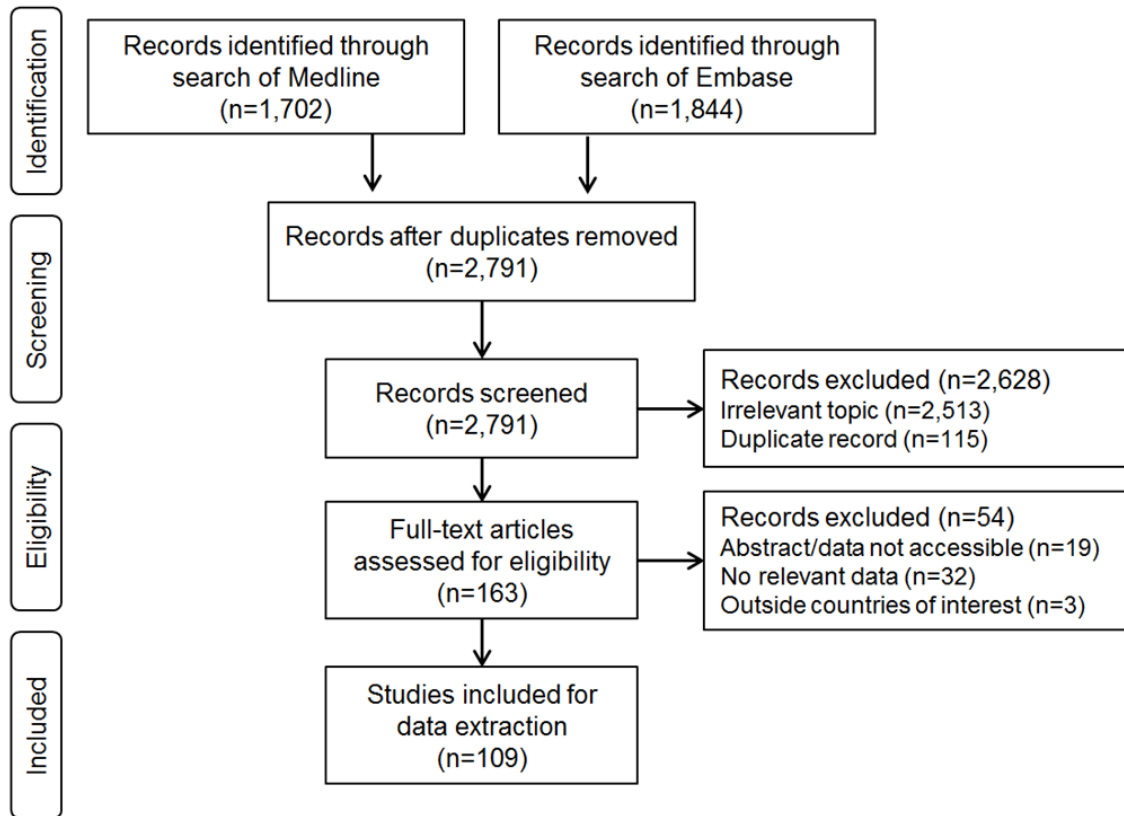

Supplement: MOESM1 [file 16295728]
