# Supplementary material for: The present and future burden of previously treated advanced non-small cell lung cancer (NSCLC) by histology and line of therapy in France, Germany, Italy, and Spain: model-based predictions
Source: Springer Nature journal article supplement (doi:10.1186/s12963-018-0174-4), 2018-11-26
Supplement: MOESM2 [file 16295728]

## Additional file 2: Literature Quality Assessment Criteria

| Quality Parameter                                 | Score                                                                                                                |                                                                                                            |                                                                                                                                                                     |
|---------------------------------------------------|----------------------------------------------------------------------------------------------------------------------|------------------------------------------------------------------------------------------------------------|---------------------------------------------------------------------------------------------------------------------------------------------------------------------|
|                                                   | 2                                                                                                                    | 1                                                                                                          | 0                                                                                                                                                                   |
| <b>Sample representativeness (selection bias)</b> | Multi-site tumor database, consecutive patients, multiple sites/countries/regions                                    | 1 practice or hospital site and consecutive patients, convenience sample                                   | Not described, none of the above                                                                                                                                    |
| <b>Study design</b>                               | Prospective, longitudinal (cross-sectional for prevalence is also appropriate)                                       | Cross-sectional, case control, retrospective evaluation of patient and/or tumor characteristics            | Not described, none of the above                                                                                                                                    |
| <b>Quality of reporting (detection bias)</b>      | Detailed description of patient selection and outcome definitions following established standards                    | Details on patient selection and outcome definitions are available but do not follow established standards | Details on how patients were selected and outcomes were missing or limited (eg, diagnostic criteria for advanced stage disease not provided)                        |
| <b>Attrition bias</b>                             | Loss to follow-up is minimal and the majority of eligible/enrolled patients have information on outcomes of interest | Loss to follow-up is described and is not either major or minor                                            | Loss to follow-up is either not described for applicable outcomes or a large portion of eligible/enrolled patients are missing information for outcomes of interest |
